# Supplementary material for: Emergence and Spread of the SARS-CoV-2 Variant of Concern Delta across Different Brazilian Regions
Source: PubMed Central journal article supplement (PMC9604183; doi:10.1128/spectrum.02641-21), 2022-08-24
Supplement: reviewer-comments.pdf [file reviewer-comments.pdf]

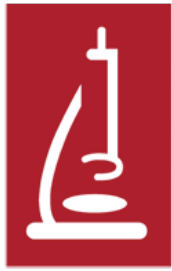

AMERICAN  
SOCIETY FOR  
MICROBIOLOGY

# Microbiology Spectrum

## Emergence and Spread of the SARS-CoV-2 Variant of Concern Delta Across Different Brazilian Regions

Ighor Arantes, Felipe Gomes Naveca, Tiago Gräf, COVID-19 Fiocruz Genomic Surveillance Network, Fabio Miyajima, Helisson Faoro, Gabriel Wallau, Edson Delatorre, Luciana Appolinario, Elisa Pereira, Tainá Venas, Alice Rocha, Renata Lopes, Marilda Mendonça Siqueira, Gonzalo Bello, and Paola Resende

*Corresponding Author(s): Paola Resende, Laboratory of Respiratory Viruses and Measles, Oswaldo Cruz Institute (IOC), FIOCRUZ, Rio de Janeiro, Brazil*

---

### Review Timeline:

|                     |                   |
|---------------------|-------------------|
| Submission Date:    | January 20, 2022  |
| Editorial Decision: | February 18, 2022 |
| Revision Received:  | July 7, 2022      |
| Accepted:           | July 12, 2022     |

---

*Editor: Juan Ludert*

*Reviewer(s): Disclosure of reviewer identity is with reference to reviewer comments included in decision letter(s). The following individuals involved in review of your submission have agreed to reveal their identity: Selene Zarate (Reviewer #1)*

### Transaction Report:

(Note: With the exception of the correction of typographical or spelling errors that could be a source of ambiguity, letters and reports are not edited. The original formatting of letters and referee reports may not be reflected in this compilation.)

**DOI: <https://doi.org/10.1128/spectrum.02641-21>**

February 18, 2022

Dr. Paola Cristina Resende  
Laboratory of Respiratory Viruses and Measles, Oswaldo Cruz Institute (IOC), FIOCRUZ, Rio de Janeiro, Brazil  
AV BRASIL, 4365  
MANGUINHOS  
RIO DE JANEIRO, RJ 21040900  
Brazil

Re: Spectrum02641-21 (Emergence and Spread of the SARS-CoV-2 Variant of Concern Delta Across Different Brazilian Regions)

Dear Dr. Paola Cristina Resende:

Thank you for submitting your manuscript to Microbiology Spectrum. Your manuscript was revised by two experts in the field and they both agree that the manuscript may be suitable for publication after revision. Please note that both reviewers mention the necessity to deposit in a public database, the generated sequences. When submitting the revised version of your paper, please provide (1) point-by-point responses to the issues raised by the reviewers as file type "Response to Reviewers," not in your cover letter, and (2) a PDF file that indicates the changes from the original submission (by highlighting or underlining the changes) as file type "Marked Up Manuscript - For Review Only". Please use this link to submit your revised manuscript - we strongly recommend that you submit your paper within the next 60 days or reach out to me. Detailed instructions on submitting your revised paper are below.

Link Not Available

Thank you for the privilege of reviewing your work. Below you will find instructions from the Microbiology Spectrum editorial office and comments generated during the review.

ASM policy requires that data be available to the public upon online posting of the article, so please verify all links to sequence records, if present, and make sure that each number retrieves the full record of the data. If a new accession number is not linked or a link is broken, provide production staff with the correct URL for the record. If the accession numbers for new data are not publicly accessible before the expected online posting of the article, publication of your article may be delayed; please contact the ASM production staff immediately with the expected release date.

The ASM Journals program strives for constant improvement in our submission and publication process. Please tell us how we can improve your experience by taking this quick [Author Survey](#).

Sincerely,

Juan E. Ludert

Editor, Microbiology Spectrum

Journals Department  
American Society for Microbiology  
1752 N St., NW  
Washington, DC 20036  
E-mail: [spectrum@asmusa.org](mailto:spectrum@asmusa.org)

Reviewer comments:

Reviewer #1 (Public repository details (Required)):

The study includes the sequencing of viral samples. Therefore, those sequences must be deposited in a public database

Reviewer #1 (Comments for the Author):

The work aims to characterize the spread and circulation of the Delta variant in Brazil. The study is comprehensive, highlights regional differences, and determines specific mutations in Brazil's lineages. There are, however, some concerns about some of the strategies utilized, particularly in the subsampling.

Major concerns:

The Delta dataset's downsizing strategy consists of automatically eliminating duplicates and keeping the sequences more similar to those from Brazil. However, there is a concern about the evenness of this subset's temporal and geographical distribution, mainly since it is used to infer the geographical origin of the main sublineages. It will be helpful to show the available Delta sequences in the database by date and region and consider enriching the representation of those states with fewer samples.

Given the unevenness of the sampling, it will also be helpful to present the total number of sequences available from Brazil in this period to assess if the contribution of other circulating variants was more significant in the north of Brazil or if a lack of sampling is to blame.

Given the sampling biases, what are the effective sample sizes reported by Tracer? Are they within the accepted values?

Minor concerns:

There are some issues with the language in the abstract, where the verbs used are not always exact; for instance, the use of the verb "born" to mean originated should be changed

Figure 1 legend: please correct "their dimension have the same scholar scheme"

Reviewer #2 (Public repository details (Required)):

sars-cov-2 genomes

Reviewer #2 (Comments for the Author):

The authors explored the emergence and spread of Delta in different Brazilian regions, and identified three major clusters. Although this work is important and the methods are solid, there are a few points that should be addressed in order to make the manuscript stronger.

As the authors mentioned in the introduction, until the summer of 2021 gamma was the main variant spreading through the population in Brazil. It would be of great help for the readers of this article to see a plot of variants in Brazil overtime, and show when exactly gamma was displaced by delta. This would give an overview of the state of the population when delta came to play.

Moreover, linked to gamma infections, it is conceivable that the population was infected at a high rate with gamma when delta came through. What is the seropositivity in the population at the time of delta surge? Vaccination status and number cases? This information need to be there.

It would also be very useful to add to the figures how many genomes have been sequenced from each region represented and to be specific whether there is a geographic bias in sampling and how the authors overcome that limitation.

The authors should also explore the possibility of these genomes to be linked to external introductions in Brazil, for that I would suggest the authors to blast their genomes against GISAID non-Brazil genomes and collect the ones that are the most similar before and after the collection date of each genome within a month. That way it would be possible to see how these clusters are local or due to importations. This is an important analysis that needs to be made in order to be sure that the clusters the authors found are correct.

Are the clusters specific genomic signatures indication of new delta sub-lineages?

Staff Comments:

### Preparing Revision Guidelines

To submit your modified manuscript, log onto the eJP submission site at <https://spectrum.msubmit.net/cgi-bin/main.plex>. Go to Author Tasks and click the appropriate manuscript title to begin the revision process. The information that you entered when you first submitted the paper will be displayed. Please update the information as necessary. Here are a few examples of required updates that authors must address:

- Point-by-point responses to the issues raised by the reviewers in a file named "Response to Reviewers," NOT IN YOUR COVER LETTER.
- Upload a compare copy of the manuscript (without figures) as a "Marked-Up Manuscript" file.
- Each figure must be uploaded as a separate file, and any multipanel figures must be assembled into one file.
- Manuscript: A .DOC version of the revised manuscript
- Figures: Editable, high-resolution, individual figure files are required at revision, TIFF or EPS files are preferred

For complete guidelines on revision requirements, please see the journal Submission and Review Process requirements at <https://journals.asm.org/journal/Spectrum/submission-review-process>. **Submissions of a paper that does not conform to Microbiology Spectrum guidelines will delay acceptance of your manuscript. "**

Please return the manuscript within 60 days; if you cannot complete the modification within this time period, please contact me. If you do not wish to modify the manuscript and prefer to submit it to another journal, please notify me of your decision immediately so that the manuscript may be formally withdrawn from consideration by Microbiology Spectrum.

If your manuscript is accepted for publication, you will be contacted separately about payment when the proofs are issued; please follow the instructions in that e-mail. Arrangements for payment must be made before your article is published. For a complete list of **Publication Fees**, including supplemental material costs, please visit our [website](#).

Corresponding authors may [join or renew ASM membership](#) to obtain discounts on publication fees. Need to upgrade your membership level? Please contact Customer Service at [Service@asmusa.org](mailto:Service@asmusa.org).

Thank you for submitting your paper to Microbiology Spectrum.

## Reviewer comments

### Reviewer #1 (Public repository details (Required)):

The study includes the sequencing of viral samples. Therefore, those sequences must be deposited in a public database

*All Brazilian sequences newly generated by the COVID-19 Fiocruz Genomic Surveillance network, were submitted to the GISAID database (<https://www.gisaid.org/>) in advance to the original submission, and their accession codes were listed in the APPENDIX 2. The other sequences, inside and outside Brazil were also downloaded from GISAID.*

### Reviewer #1 (Comments for the Author):

1. The work aims to characterize the spread and circulation of the Delta variant in Brazil. The study is comprehensive, highlights regional differences, and determines specific mutations in Brazil's lineages. There are, however, some concerns about some of the strategies utilized, particularly in the subsampling.

### Major concerns:

2. The Delta dataset's downsizing strategy consists of automatically eliminating duplicates and keeping the sequences more similar to those from Brazil. However, there is a concern about the evenness of this subset's temporal and geographical distribution, mainly since it is used to infer the geographical origin of the main sublineages. It will be helpful to show the available Delta sequences in the database by date and region and consider enriching the representation of those states with fewer samples.

*The downsizing of our dataset by the elimination of duplicated genomes was applied only to non-Brazilian sequences while those from Brazil available until 2021-09-07 were all kept, and removed only if falling in one or more of the two cases of exclusion, I) absence of collection date, and II)  $N_s > 3\%$ . We agree with the reviewer's observation that the downsampling of non-Brazilian sequences might bias the inferred epidemiological links between the three identified main clades (BR-I, BR-II and BR-III) and sequences sampled outside Brazil. Therefore, the presentation of the results was limited to the reconstructed ancestral location of the clades' MRCA already in the country, where the dataset was kept in its entirety. The text was changed in the newly submitted version to clarify the actual methodology.*

3. Given the unevenness of the sampling, it will also be helpful to present the total number of sequences available from Brazil in this period to assess if the contribution of other circulating variants was more significant in the north of Brazil or if a lack of sampling is to blame.

*In order to clarify the relative prevalence of the differently circulating variants across time, we added a new Fig 1, showing the contribution of Delta (B.1.617.2 + AY\*), Gamma (P.1 + P.1\*) and other circulating variants in the country's available genome sequences. In Fig 1 A-F is shown the absolute number of SARS-CoV-2 positive cases by region and the relative prevalence of VOCs Gamma and Delta and of other variants. The data used in this representation is available at our institution website (in english): <http://www.genomahcov.fiocruz.br/dashboard-en/>. In the graphs, it is perceivable that Brazil's northern region's small contribution to the Delta epidemic during the period considered in the present study is not due to a particularly low sampling in the period as it is coincidental with a marked reduction in the total number of positive cases in those states.*

4. Given the sampling biases, what are the effective sample sizes reported by Tracer? Are they within the accepted values?

*All parameters of the BSKL model analysis in Beast 1.10 indeed showed ESS values above 200. To acquiesce the reviewer's concern, the methodology section was updated to clarify this aspect.*

Minor concerns:

5. There are some issues with the language in the abstract, where the verbs used are not always exact; for instance, the use of the verb "born" to mean originated should be changed

*The abstract text was revised in compliance with the reviewer's suggestion.*

6. Figure 1 legend: please correct "their dimension have the same scholar scheme".

*The legend was revised in compliance with the reviewer's suggestion.*

Reviewer #2 (Public repository details (Required)):

1. sars-cov-2 genomes

*All Brazilian sequences newly generated by the COVID-19 Fiocruz Genomic Surveillance network, were submitted to the GISAID database (<https://www.gisaid.org/>) in advance to the original submission, and their accession codes were listed in the APPENDIX 2. The other sequences, inside and outside Brazil were also downloaded from GISAID.*

Reviewer #2 (Comments for the Author):

The authors explored the emergence and spread of Delta in different Brazilian regions, and identified three major clusters. Although this work is important and the methods are solid, there are a few points that should be addressed in order to make the manuscript stronger.

1. As the authors mentioned in the introduction, until the summer of 2021 gamma was the main variant spreading through the population in Brazil. It would be of great help for the readers of this article to see a plot of variants in Brazil overtime, and show when exactly gamma was displaced by delta. This would give an overview of the state of the population when delta came to play.

*In order to clarify the relative prevalence of the different circulating variants across time in Brazil, we added Figure 1 showing the contribution of Delta (B.1.617.2 + AY\*), Gamma (P.1 + P.1\*) and other circulating variants to the country's available genome sequences. The data used in this representation is available at our institution website (in english): <http://www.genomahcov.fiocruz.br/dashboard-en/>.*

2. Moreover, linked to gamma infections, it is conceivable that the population was infected at a high rate with gamma when delta came through. What is the seropositivity in the population at the time of delta surge? Vaccination status and number cases? This information needs to be there.

*Even though a comprehensive analysis of the Brazilian population's seropositivity by the time of introduction of Delta is unavailable, we added a Supplementary Figure 1 that describes the vaccination status of the population, showing the evolution of individuals with at least one dose as well as those fully vaccinated. The Discussion section was also modified to include this information.*

3. It would also be very useful to add to the figures how many genomes have been sequenced from each region represented and to be specific whether there is a geographic bias in sampling and how the authors overcome that limitation.

*The sequences listed in Table 1 represent all Delta genomes available from Brazil until 2021-09-07, and clearly the South (10.38%) and Southeast (83.17%) regions are the most represented in the overall dataset. Nonetheless, this observation is not the product of a bias in the sequences used in the study. As can be seen in the graphs represented in Figure 1, there is a homogenous geographical disparity in contribution to the country's SARS-CoV-2 genomes across time and a roughly comparable evolution in the contribution of VOC's Gamma and Delta across time in the five geographic regions'.*

4. The authors should also explore the possibility of these genomes to be linked to external introductions in Brazil, for that I would suggest the authors to blast their genomes against GISAID non-Brazil genomes and collect the ones that are the most similar before and after the collection date of each genome within a month. That way it would be possible to see how these clusters are local or due to importations. This is an important analysis that needs to be made in order to be sure that the clusters the authors found are correct.

*The way in which the dataset composition was described in the original submission was ambiguous and didn't reflect the actual process, having been updated in the newly submitted version. Therefore, it's possible the reviewer concern has already been addressed. All Delta variant sequences available until 2021-09-07 (n = 948,925) at GISAID (<https://www.gisaid.org/>) were downloaded. All Brazilian sequences were kept in the study, being removed only if falling in one or more of the two cases of exclusion, I) absence of collection date and II) Ns > 3%. Sequences outside Brazil, however, were downsampled in three stages. In the first one, identical sequences were removed using the CD-hit software. In the second one, all Brazilian sequences were employed as a query in a local blast search, as suggested by the reviewer, and we selected the 10 non-Brazilian sequences most similar to the Brazilian queries. The sequences kept then were used to infer an initial ML tree (not shown) and in the third and final stage of the downsampling, clades not including a Brazilian sample were removed, leading to the dataset used in the final ML tree (Figure 2). Therefore, all Brazilian sequences have been exposed by a blast search to the Delta lineage worldwide diversity, increasing the chances, as seen in the statistical support of the identified clades, that their association in the ML topology was not a sampling artifact.*

5. Are the clusters specific genomic signatures indication of new delta sub-lineages?

*The identified signatures in the three clades in fact characterize them as Delta sub-lineages. BR-I was composed of lineages AY.99/AY.99.1/AY.99.2, BR-II of lineage AY.101, and BR-III of lineage AY.46.3. Given the that lineages AY.101 and AY.46.3 have the absolute majority of their sequences (> 95%) in Brazil, and that no other sequences in both lineages were places at the root of their ML trees, the paper was changed in several*



*places in order to change the used nomenclature, as BR-II and BR-III were abandoned in favor of the lineages themselves.*

July 12, 2022

Dr. Paola Cristina Resende  
Laboratory of Respiratory Viruses and Measles, Oswaldo Cruz Institute (IOC), FIOCRUZ, Rio de Janeiro, Brazil  
AV BRASIL, 4365  
MANGUINHOS  
RIO DE JANEIRO, RJ 21040900  
Brazil

Re: Spectrum02641-21R1 (Emergence and Spread of the SARS-CoV-2 Variant of Concern Delta Across Different Brazilian Regions)

Dear Dr. Paola Cristina Resende:

I am glad to inform you that your manuscript has been accepted, and I am forwarding it to the ASM Journals Department for publication. You will be notified when your proofs are ready to be viewed.

The ASM Journals program strives for constant improvement in our submission and publication process. Please tell us how we can improve your experience by taking this quick [Author Survey](#).

As an open-access publication, Spectrum receives no financial support from paid subscriptions and depends on authors' prompt payment of publication fees as soon as their articles are accepted. You will be contacted separately about payment when the proofs are issued; please follow the instructions in that e-mail. Arrangements for payment must be made before your article is published. For a complete list of **Publication Fees**, including supplemental material costs, please visit our [website](#).

ASM policy requires that data be available to the public upon online posting of the article, so please verify all links to sequence records, if present, and make sure that each number retrieves the full record of the data. If a new accession number is not linked or a link is broken, provide production staff with the correct URL for the record. If the accession numbers for new data are not publicly accessible before the expected online posting of the article, publication of your article may be delayed; please contact the ASM production staff immediately with the expected release date.

Corresponding authors may [join or renew ASM membership](#) to obtain discounts on publication fees. Need to upgrade your membership level? Please contact Customer Service at [Service@asmusa.org](mailto:Service@asmusa.org).

Thank you for submitting your paper to Spectrum.

Sincerely,

Juan E. Ludert  
Editor, Microbiology Spectrum

Journals Department  
American Society for Microbiology  
1752 N St., NW  
Washington, DC 20036  
E-mail: [spectrum@asmusa.org](mailto:spectrum@asmusa.org)

Supplemental Material: Accept
